# Supplementary material for: Patient experiences in trials of minimally invasive thoracic surgery: A mixed-methods study
Source: Research Square preprint supplement (doi:10.21203/rs.3.rs-8824381/v1), 2026-02-19
Supplement: Supplementary file 1 [file 9391cedb326897dafe0f183b.docx]

**Supplement 2** Semi-structured interview guide and inquiry logic

| **Demographic characteristic of dietitians** |
| --- |
| What is your age range? (years) |
| 18-24 |
| 25-30 |
| 31-35 |
| 35-44 |
| 45-54 |
| 55-64 |
| 65-74 |
| 75+ |
| What gender do you identify as? |
| What is your employment status?  Employed  Unemployed  Retired |

Prompts will be given to elicit more information if short answers are provided for the below e.g tell me more about that/this, can you please expand on that/this etc.

| **Interview Questions** | **Inquiry Logic** |
| --- | --- |
| Before your robotic surgery how did you feel about being in a clinical trial? | Pre-trial perceptions and decision-making |
| Describe your interactions with clinical trials staff before you consented to the trial and at the time of consent. | Interactions with clinical trials staff. |
| How well did you feel you understood the information given to you about the clinical trail? | Confidence in participation |
| Describe the level of confidence you had about being on a clinical trial and having robotic surgery. What factors contributed to increasing or decreasing your confidence e.g. trial protocols, robotic surgery, medical team, risk/benefits? | Confidence in participation/perceived benefit |
| Thinking about your time in hospital, can describe your interactions with clinical trials staff? | Interactions with clinical trials staff. |
| How did their involvement affect your care? | Hospital experience |
| Thinking about your experience after discharge from hospital, describe your experiences recovery from robotic surgery whilst on a clinical trial e.g. adequacy of follow up communication, consultations with clinical trials staff etc. | Post-surgery experience and follow up. |
| Reflecting on your experience on a clinical trial as a whole, what was the worst thing about being on a clinical trial? | Challenges |
| Reflecting on your experience on a clinical trial as a whole, what was the best thing about being on a clinical trial? | Benefits |
| Reflecting on your experience undergoing robotic surgery, describe the worst thing about this experience? | Challenges |
| Reflecting on your experience undergoing robotic surgery, describe the best thing about this experience? | Benefits |
| If given the choice again, describe why you would or wouldn’t consent to be a participant on a clinical trial? | Future considerations |
| Would you recommend being on a clinical trial to others? Why/Why not? | Future considerations and recommendations |
